# Supplementary material for: HSF4 as a Prognostic Predictor and Therapeutic Target in Colorectal Cancer Linked to Immune Status
Source: Research Square preprint supplement (doi:10.21203/rs.3.rs-8375517/v1), 2026-01-20
Supplement: Supplementary file 1 [file 291f6e88d0385bf551b17e1b.xlsx]

## Sheet: CRC
Supplementary Table S1. List of TCGA sample barcodes used in the analysis
ID	group
TCGA.3L.AA1B.01A.11R.A37K.07	T
TCGA.4N.A93T.01A.11R.A37K.07	T
TCGA.4T.AA8H.01A.11R.A41B.07	T
TCGA.5M.AAT5.01A.21R.A41B.07	T
TCGA.5M.AAT6.01A.11R.A41B.07	T
TCGA.5M.AATA.01A.31R.A41B.07	T
TCGA.5M.AATE.01A.11R.A41B.07	T
TCGA.A6.2671.01A.01R.1410.07	T
TCGA.A6.2671.11A.01R.A32Z.07	N
TCGA.A6.2672.01A.01R.0826.07	T
TCGA.A6.2672.01B.03R.2302.07	N
TCGA.A6.2674.01A.02R.0821.07	T
TCGA.A6.2674.01A.02R.A278.07	T
TCGA.A6.2674.01B.04R.A277.07	N
TCGA.A6.2675.01A.02R.1723.07	T
TCGA.A6.2675.11A.01R.1723.07	N
TCGA.A6.2676.01A.01R.0826.07	T
TCGA.A6.2677.01A.01R.0821.07	T
TCGA.A6.2677.01A.01R.A278.07	T
TCGA.A6.2677.01B.02R.A277.07	N
TCGA.A6.2678.01A.01R.0821.07	T
TCGA.A6.2678.11A.01R.A32Z.07	N
TCGA.A6.2680.01A.01R.1410.07	T
TCGA.A6.2680.11A.01R.A32Z.07	N
TCGA.A6.2681.01A.01R.1410.07	T
TCGA.A6.2682.01A.01R.1410.07	T
TCGA.A6.2682.11A.01R.A32Z.07	N
TCGA.A6.2683.01A.01R.0821.07	T
TCGA.A6.2683.11A.01R.A32Z.07	N
TCGA.A6.2684.01A.01R.1410.07	T
TCGA.A6.2684.01A.01R.A278.07	T
TCGA.A6.2684.11A.01R.A32Z.07	N
TCGA.A6.2685.11A.01R.A32Z.07	N
TCGA.A6.2686.01A.01R.A32Z.07	T
TCGA.A6.2686.11A.01R.A32Z.07	N
TCGA.A6.3807.01A.01R.1022.07	T
TCGA.A6.3808.01A.01R.1022.07	T
TCGA.A6.3809.01A.01R.1022.07	T
TCGA.A6.3809.01A.01R.A278.07	T
TCGA.A6.3810.01A.01R.1022.07	T
TCGA.A6.3810.01A.01R.A278.07	T
TCGA.A6.4105.01A.02R.1774.07	T
TCGA.A6.4107.01A.02R.1410.07	T
TCGA.A6.5656.01A.21R.1839.07	T
TCGA.A6.5656.01A.21R.A278.07	T
TCGA.A6.5656.01B.02R.A277.07	N
TCGA.A6.5657.01A.01R.A32Z.07	T
TCGA.A6.5659.01A.01R.1653.07	T
TCGA.A6.5659.01B.04R.A277.07	N
TCGA.A6.5659.11A.01R.1653.07	N
TCGA.A6.5660.01A.01R.1653.07	T
TCGA.A6.5661.01A.01R.1653.07	T
TCGA.A6.5661.01B.05R.2302.07	N
TCGA.A6.5662.01A.01R.1653.07	T
TCGA.A6.5662.11A.01R.1653.07	N
TCGA.A6.5664.01A.21R.1839.07	T
TCGA.A6.5665.01A.01R.1653.07	T
TCGA.A6.5665.11A.01R.1653.07	N
TCGA.A6.5666.01A.01R.1653.07	T
TCGA.A6.5667.01A.21R.1723.07	T
TCGA.A6.6137.01A.11R.1774.07	T
TCGA.A6.6138.01A.11R.1774.07	T
TCGA.A6.6140.01A.11R.1774.07	T
TCGA.A6.6141.01A.11R.1774.07	T
TCGA.A6.6142.01A.11R.1774.07	T
TCGA.A6.6648.01A.11R.1774.07	T
TCGA.A6.6649.01A.11R.1774.07	T
TCGA.A6.6650.01A.11R.1774.07	T
TCGA.A6.6652.01A.11R.1774.07	T
TCGA.A6.6653.01A.11R.1774.07	T
TCGA.A6.6654.01A.21R.1839.07	T
TCGA.A6.6780.01A.11R.1839.07	T
TCGA.A6.6780.01B.04R.A277.07	N
TCGA.A6.6781.01A.22R.1928.07	T
TCGA.A6.6781.01A.22R.A278.07	T
TCGA.A6.6781.01B.06R.A277.07	N
TCGA.A6.6782.01A.11R.1839.07	T
TCGA.A6.A565.01A.31R.A28H.07	T
TCGA.A6.A566.01A.11R.A28H.07	T
TCGA.A6.A567.01A.31R.A28H.07	T
TCGA.A6.A56B.01A.31R.A28H.07	T
TCGA.A6.A5ZU.01A.11R.A28H.07	T
TCGA.AA.3488.01A.01R.1410.07	T
TCGA.AA.3489.01A.21R.1839.07	T
TCGA.AA.3489.11A.01R.1839.07	N
TCGA.AA.3494.01A.01R.1410.07	T
TCGA.AA.3495.01A.01R.1410.07	T
TCGA.AA.3496.01A.21R.1839.07	T
TCGA.AA.3502.01A.01R.1410.07	T
TCGA.AA.3506.01A.01R.1410.07	T
TCGA.AA.3509.01A.01R.1410.07	T
TCGA.AA.3510.01A.01R.1410.07	T
TCGA.AA.3511.01A.21R.1839.07	T
TCGA.AA.3514.01A.02R.0821.07	T
TCGA.AA.3514.11A.01R.A32Z.07	N
TCGA.AA.3516.01A.02R.0826.07	T
TCGA.AA.3516.11A.01R.A32Z.07	N
TCGA.AA.3517.01A.01R.0821.07	T
TCGA.AA.3518.01A.02R.0826.07	T
TCGA.AA.3519.01A.02R.0821.07	T
TCGA.AA.3520.01A.01R.0821.07	T
TCGA.AA.3521.01A.01R.0821.07	T
TCGA.AA.3522.01A.01R.0821.07	T
TCGA.AA.3522.11A.01R.A32Z.07	N
TCGA.AA.3524.01A.02R.0821.07	T
TCGA.AA.3525.01A.02R.0826.07	T
TCGA.AA.3526.01A.02R.A32Z.07	T
TCGA.AA.3527.01A.01R.0821.07	T
TCGA.AA.3527.11A.01R.A32Z.07	N
TCGA.AA.3529.01A.02R.0821.07	T
TCGA.AA.3530.01A.01R.1022.07	T
TCGA.AA.3531.01A.01R.0821.07	T
TCGA.AA.3532.01A.01R.0821.07	T
TCGA.AA.3534.01A.01R.0821.07	T
TCGA.AA.3534.11A.01R.A32Z.07	N
TCGA.AA.3538.01A.01R.0821.07	T
TCGA.AA.3542.01A.02R.1873.07	T
TCGA.AA.3543.01A.01R.0826.07	T
TCGA.AA.3544.01A.01R.1873.07	T
TCGA.AA.3548.01A.01R.1873.07	T
TCGA.AA.3549.01A.02R.0821.07	T
TCGA.AA.3553.01A.01R.0821.07	T
TCGA.AA.3554.01A.01R.0826.07	T
TCGA.AA.3555.01A.01R.0821.07	T
TCGA.AA.3556.01A.01R.0821.07	T
TCGA.AA.3560.01A.01R.0821.07	T
TCGA.AA.3562.01A.02R.0821.07	T
TCGA.AA.3655.01A.02R.1723.07	T
TCGA.AA.3655.11A.01R.1723.07	N
TCGA.AA.3660.01A.01R.1723.07	T
TCGA.AA.3660.11A.01R.1723.07	N
TCGA.AA.3662.01A.01R.1723.07	T
TCGA.AA.3662.11A.01R.1723.07	N
TCGA.AA.3663.01A.01R.1723.07	T
TCGA.AA.3663.11A.01R.1723.07	N
TCGA.AA.3664.01A.01R.0905.07	T
TCGA.AA.3666.01A.02R.0905.07	T
TCGA.AA.3667.01A.01R.0905.07	T
TCGA.AA.3672.01A.01R.0905.07	T
TCGA.AA.3673.01A.01R.0905.07	T
TCGA.AA.3678.01A.01R.0905.07	T
TCGA.AA.3679.01A.02R.0905.07	T
TCGA.AA.3680.01A.01R.0905.07	T
TCGA.AA.3681.01A.01R.0905.07	T
TCGA.AA.3684.01A.02R.0905.07	T
TCGA.AA.3685.01A.02R.A32Z.07	T
TCGA.AA.3688.01A.01R.0905.07	T
TCGA.AA.3692.01A.01R.0905.07	T
TCGA.AA.3693.01A.01R.0905.07	T
TCGA.AA.3695.01A.01R.0905.07	T
TCGA.AA.3696.01A.01R.0905.07	T
TCGA.AA.3697.01A.01R.1723.07	T
TCGA.AA.3710.01A.01R.1022.07	T
TCGA.AA.3712.01A.21R.1723.07	T
TCGA.AA.3713.01A.21R.1723.07	T
TCGA.AA.3713.11A.01R.1723.07	N
TCGA.AA.3715.01A.01R.0905.07	T
TCGA.AA.3811.01A.01R.1022.07	T
TCGA.AA.3812.01A.01R.0905.07	T
TCGA.AA.3814.01A.01R.0905.07	T
TCGA.AA.3815.01A.01R.1022.07	T
TCGA.AA.3818.01A.01R.0905.07	T
TCGA.AA.3819.01A.01R.0905.07	T
TCGA.AA.3821.01A.01R.1022.07	T
TCGA.AA.3831.01A.01R.0905.07	T
TCGA.AA.3833.01A.01R.0905.07	T
TCGA.AA.3837.01A.01R.0905.07	T
TCGA.AA.3841.01A.01R.0905.07	T
TCGA.AA.3842.01A.01R.1022.07	T
TCGA.AA.3844.01A.01R.1022.07	T
TCGA.AA.3845.01A.01R.1022.07	T
TCGA.AA.3846.01A.01R.1022.07	T
TCGA.AA.3848.01A.01R.0905.07	T
TCGA.AA.3850.01A.01R.1022.07	T
TCGA.AA.3852.01A.01R.0905.07	T
TCGA.AA.3854.01A.01R.0905.07	T
TCGA.AA.3855.01A.01R.1022.07	T
TCGA.AA.3856.01A.01R.0905.07	T
TCGA.AA.3858.01A.01R.0905.07	T
TCGA.AA.3860.01A.02R.0905.07	T
TCGA.AA.3861.01A.01R.1022.07	T
TCGA.AA.3862.01A.01R.1022.07	T
TCGA.AA.3864.01A.01R.1022.07	T
TCGA.AA.3866.01A.01R.1022.07	T
TCGA.AA.3867.01A.01R.1022.07	T
TCGA.AA.3869.01A.01R.1022.07	T
TCGA.AA.3870.01A.01R.1022.07	T
TCGA.AA.3872.01A.01R.1022.07	T
TCGA.AA.3875.01A.01R.0905.07	T
TCGA.AA.3877.01A.01R.1022.07	T
TCGA.AA.3930.01A.01R.1022.07	T
TCGA.AA.3939.01A.01R.1022.07	T
TCGA.AA.3941.01A.01R.1022.07	T
TCGA.AA.3947.01A.01R.1022.07	T
TCGA.AA.3949.01A.01R.1022.07	T
TCGA.AA.3950.01A.02R.1022.07	T
TCGA.AA.3952.01A.01R.1022.07	T
TCGA.AA.3955.01A.02R.1022.07	T
TCGA.AA.3956.01A.02R.1022.07	T
TCGA.AA.3966.01A.01R.1113.07	T
TCGA.AA.3968.01A.01R.1022.07	T
TCGA.AA.3970.01A.01R.1022.07	T
TCGA.AA.3971.01A.01R.1022.07	T
TCGA.AA.3972.01A.01R.1022.07	T
TCGA.AA.3973.01A.01R.1022.07	T
TCGA.AA.3975.01A.01R.1022.07	T
TCGA.AA.3977.01A.01R.1022.07	T
TCGA.AA.3980.01A.02R.1022.07	T
TCGA.AA.3986.01A.02R.1022.07	T
TCGA.AA.3989.01A.01R.1022.07	T
TCGA.AA.3994.01A.01R.1113.07	T
TCGA.AA.A004.01A.01R.A00A.07	T
TCGA.AA.A00A.01A.01R.A002.07	T
TCGA.AA.A00E.01A.01R.A002.07	T
TCGA.AA.A00F.01A.01R.A002.07	T
TCGA.AA.A00J.01A.02R.A002.07	T
TCGA.AA.A00K.01A.02R.A002.07	T
TCGA.AA.A00L.01A.01R.A002.07	T
TCGA.AA.A00N.01A.02R.A00A.07	T
TCGA.AA.A00O.01A.02R.A089.07	T
TCGA.AA.A00Q.01A.01R.A002.07	T
TCGA.AA.A00U.01A.01R.A002.07	T
TCGA.AA.A00W.01A.01R.A002.07	T
TCGA.AA.A00Z.01A.01R.A002.07	T
TCGA.AA.A010.01A.01R.A089.07	T
TCGA.AA.A017.01A.01R.A00A.07	T
TCGA.AA.A01C.01A.01R.A00A.07	T
TCGA.AA.A01D.01A.01R.A00A.07	T
TCGA.AA.A01F.01A.01R.A002.07	T
TCGA.AA.A01G.01A.01R.A002.07	T
TCGA.AA.A01I.01A.02R.A089.07	T
TCGA.AA.A01K.01A.01R.A00A.07	T
TCGA.AA.A01P.01A.21R.A083.07	T
TCGA.AA.A01Q.01A.01R.A002.07	T
TCGA.AA.A01R.01A.21R.A083.07	T
TCGA.AA.A01S.01A.21R.A083.07	T
TCGA.AA.A01V.01A.23R.A083.07	T
TCGA.AA.A01X.01A.21R.A083.07	T
TCGA.AA.A01Z.01A.11R.A083.07	T
TCGA.AA.A024.01A.02R.A00A.07	T
TCGA.AA.A029.01A.01R.A00A.07	T
TCGA.AA.A02E.01A.01R.A00A.07	T
TCGA.AA.A02F.01A.01R.A089.07	T
TCGA.AA.A02H.01A.01R.A089.07	T
TCGA.AA.A02J.01A.01R.A00A.07	T
TCGA.AA.A02K.01A.03R.A32Y.07	T
TCGA.AA.A02O.01A.21R.A16W.07	T
TCGA.AA.A02R.01A.01R.A00A.07	T
TCGA.AA.A02W.01A.01R.A00A.07	T
TCGA.AA.A02Y.01A.43R.A32Y.07	T
TCGA.AA.A03F.01A.11R.A16W.07	T
TCGA.AA.A03J.01A.21R.A16W.07	T
TCGA.AD.5900.01A.11R.1653.07	T
TCGA.AD.6888.01A.11R.1928.07	T
TCGA.AD.6890.01A.11R.1928.07	T
TCGA.AD.6895.01A.11R.1928.07	T
TCGA.AD.6899.01A.11R.1928.07	T
TCGA.AD.6901.01A.11R.1928.07	T
TCGA.AD.6963.01A.11R.1928.07	T
TCGA.AD.6964.01A.11R.1928.07	T
TCGA.AD.A5EJ.01A.11R.A28H.07	T
TCGA.AD.A5EK.01A.11R.A28H.07	T
TCGA.AF.2687.01A.02R.1736.07	T
TCGA.AF.2691.11A.01R.A32Z.07	N
TCGA.AF.2692.01A.01R.0821.07	T
TCGA.AF.2693.01A.02R.1736.07	T
TCGA.AF.3400.11A.01R.A32Z.07	N
TCGA.AF.3911.01A.01R.1736.07	T
TCGA.AF.4110.01A.02R.1736.07	T
TCGA.AF.5654.01A.01R.1660.07	T
TCGA.AF.6655.01A.11R.1830.07	T
TCGA.AF.6672.01A.11R.1830.07	T
TCGA.AF.A56L.01A.31R.A39D.07	T
TCGA.AF.A56N.01A.12R.A39D.07	T
TCGA.AG.3574.01A.01R.0821.07	T
TCGA.AG.3575.01A.01R.0821.07	T
TCGA.AG.3578.01A.01R.0821.07	T
TCGA.AG.3581.01A.01R.0821.07	T
TCGA.AG.3584.01A.01R.0821.07	T
TCGA.AG.3587.01A.01R.0821.07	T
TCGA.AG.3598.01A.01R.0826.07	T
TCGA.AG.3600.01A.01R.0826.07	T
TCGA.AG.3611.01A.01R.0826.07	T
TCGA.AG.3725.01A.11R.1736.07	T
TCGA.AG.3725.11A.01R.1736.07	N
TCGA.AG.3731.01A.11R.1736.07	T
TCGA.AG.3731.11A.01R.1736.07	N
TCGA.AG.3732.11A.01R.1660.07	N
TCGA.AG.3742.01A.11R.1660.07	T
TCGA.AG.3878.01A.02R.0905.07	T
TCGA.AG.3892.01A.01R.1119.07	T
TCGA.AG.3893.01A.01R.1119.07	T
TCGA.AG.3898.01A.01R.1119.07	T
TCGA.AG.3901.01A.01R.1119.07	T
TCGA.AG.4001.01A.02R.1119.07	T
TCGA.AG.4007.01A.01R.1119.07	T
TCGA.AG.4021.01A.01R.1736.07	T
TCGA.AG.A008.01A.01R.A002.07	T
TCGA.AG.A00C.01A.01R.A002.07	T
TCGA.AG.A00H.01A.01R.A00A.07	T
TCGA.AG.A011.01A.01R.A002.07	T
TCGA.AG.A014.01A.02R.A002.07	T
TCGA.AG.A015.01A.01R.A002.07	T
TCGA.AG.A01J.01A.01R.A00A.07	T
TCGA.AG.A01L.01A.01R.A002.07	T
TCGA.AG.A01N.01A.01R.A00A.07	T
TCGA.AG.A025.01A.01R.A00A.07	T
TCGA.AG.A02N.01A.11R.A083.07	T
TCGA.AG.A02X.01A.01R.A00A.07	T
TCGA.AG.A032.01A.01R.A00A.07	T
TCGA.AH.6549.01A.11R.1830.07	T
TCGA.AH.6644.01A.21R.1830.07	T
TCGA.AH.6903.01A.11R.1928.07	T
TCGA.AM.5820.01A.01R.1653.07	T
TCGA.AM.5821.01A.01R.1653.07	T
TCGA.AU.3779.01A.01R.1723.07	T
TCGA.AU.6004.01A.11R.1723.07	T
TCGA.AY.4070.01A.01R.1113.07	T
TCGA.AY.4071.01A.01R.1113.07	T
TCGA.AY.5543.01A.01R.1653.07	T
TCGA.AY.6386.01A.21R.1723.07	T
TCGA.AY.A54L.01A.11R.A28H.07	T
TCGA.AY.A71X.01A.12R.A37K.07	T
TCGA.AY.A8YK.01A.11R.A41B.07	T
TCGA.AZ.4308.01A.01R.1410.07	T
TCGA.AZ.4313.01A.01R.1410.07	T
TCGA.AZ.4315.01A.01R.1410.07	T
TCGA.AZ.4614.01A.01R.1410.07	T
TCGA.AZ.4615.01A.01R.1410.07	T
TCGA.AZ.4616.01A.21R.1839.07	T
TCGA.AZ.4681.01A.01R.1410.07	T
TCGA.AZ.4682.01B.01R.A32Z.07	N
TCGA.AZ.4684.01A.01R.1410.07	T
TCGA.AZ.5403.01A.01R.1653.07	T
TCGA.AZ.5407.01A.01R.1723.07	T
TCGA.AZ.6598.01A.11R.1774.07	T
TCGA.AZ.6599.01A.11R.1774.07	T
TCGA.AZ.6599.11A.01R.1774.07	N
TCGA.AZ.6600.01A.11R.1774.07	T
TCGA.AZ.6601.01A.11R.1774.07	T
TCGA.AZ.6603.01A.11R.1839.07	T
TCGA.AZ.6605.01A.11R.1839.07	T
TCGA.AZ.6606.01A.11R.1839.07	T
TCGA.AZ.6607.01A.11R.1839.07	T
TCGA.AZ.6608.01A.11R.1839.07	T
TCGA.BM.6198.01A.11R.1736.07	T
TCGA.CA.5254.01A.21R.1839.07	T
TCGA.CA.5255.01A.11R.1839.07	T
TCGA.CA.5256.01A.01R.1410.07	T
TCGA.CA.5796.01A.01R.1653.07	T
TCGA.CA.5797.01A.01R.1653.07	T
TCGA.CA.6715.01A.21R.1839.07	T
TCGA.CA.6716.01A.11R.1839.07	T
TCGA.CA.6717.01A.11R.1839.07	T
TCGA.CA.6719.01A.11R.1839.07	T
TCGA.CI.6619.01B.11R.1830.07	N
TCGA.CI.6620.01A.11R.1830.07	T
TCGA.CI.6622.01A.11R.1830.07	T
TCGA.CI.6623.01B.11R.1830.07	N
TCGA.CK.4947.01B.11R.1653.07	N
TCGA.CK.4950.01A.01R.1723.07	T
TCGA.CK.4951.01A.01R.1410.07	T
TCGA.CK.4952.01A.01R.1723.07	T
TCGA.CK.5912.01A.11R.1653.07	T
TCGA.CK.5913.01A.11R.1653.07	T
TCGA.CK.5914.01A.11R.1653.07	T
TCGA.CK.5915.01A.11R.1653.07	T
TCGA.CK.5916.01A.11R.1653.07	T
TCGA.CK.6746.01A.11R.1839.07	T
TCGA.CK.6747.01A.11R.1839.07	T
TCGA.CK.6748.01A.11R.1839.07	T
TCGA.CK.6751.01A.11R.1839.07	T
TCGA.CL.5918.01A.11R.1660.07	T
TCGA.CM.4743.01A.01R.1723.07	T
TCGA.CM.4744.01A.01R.A32Z.07	T
TCGA.CM.4746.01A.01R.1410.07	T
TCGA.CM.4747.01A.01R.1410.07	T
TCGA.CM.4748.01A.01R.1410.07	T
TCGA.CM.4750.01A.01R.1410.07	T
TCGA.CM.4751.01A.02R.1839.07	T
TCGA.CM.4752.01A.01R.1410.07	T
TCGA.CM.5341.01A.01R.1410.07	T
TCGA.CM.5349.01A.21R.1723.07	T
TCGA.CM.5861.01A.01R.1653.07	T
TCGA.CM.5862.01A.01R.1653.07	T
TCGA.CM.5863.01A.21R.1839.07	T
TCGA.CM.5868.01A.01R.1653.07	T
TCGA.CM.6161.01A.11R.1653.07	T
TCGA.CM.6162.01A.11R.1653.07	T
TCGA.CM.6163.01A.11R.1653.07	T
TCGA.CM.6164.01A.11R.1653.07	T
TCGA.CM.6165.01A.11R.1653.07	T
TCGA.CM.6166.01A.11R.1653.07	T
TCGA.CM.6167.01A.11R.1653.07	T
TCGA.CM.6168.01A.11R.1653.07	T
TCGA.CM.6169.01A.11R.1653.07	T
TCGA.CM.6170.01A.11R.1653.07	T
TCGA.CM.6171.01A.11R.1653.07	T
TCGA.CM.6172.01A.11R.1653.07	T
TCGA.CM.6675.01A.11R.1839.07	T
TCGA.CM.6676.01A.11R.1839.07	T
TCGA.CM.6677.01A.11R.1839.07	T
TCGA.CM.6678.01A.11R.1839.07	T
TCGA.CM.6679.01A.11R.1839.07	T
TCGA.CM.6680.01A.11R.1839.07	T
TCGA.D5.5537.01A.21R.1928.07	T
TCGA.D5.5538.01A.01R.1653.07	T
TCGA.D5.5540.01A.01R.1653.07	T
TCGA.D5.5541.01A.01R.1653.07	T
TCGA.D5.6530.01A.11R.1723.07	T
TCGA.D5.6531.01A.11R.1723.07	T
TCGA.D5.6532.01A.11R.1723.07	T
TCGA.D5.6533.01A.11R.1723.07	T
TCGA.D5.6535.01A.11R.1723.07	T
TCGA.D5.6536.01A.11R.1723.07	T
TCGA.D5.6537.01A.11R.1723.07	T
TCGA.D5.6538.01A.11R.1723.07	T
TCGA.D5.6539.01A.11R.1723.07	T
TCGA.D5.6540.01A.11R.1723.07	T
TCGA.D5.6541.01A.11R.1723.07	T
TCGA.D5.6898.01A.11R.1928.07	T
TCGA.D5.6920.01A.11R.1928.07	T
TCGA.D5.6922.01A.11R.1928.07	T
TCGA.D5.6923.01A.11R.A32Z.07	T
TCGA.D5.6924.01A.11R.1928.07	T
TCGA.D5.6926.01A.11R.1928.07	T
TCGA.D5.6928.01A.11R.1928.07	T
TCGA.D5.6930.01A.11R.1928.07	T
TCGA.D5.6931.01A.11R.1928.07	T
TCGA.D5.6932.01A.11R.1928.07	T
TCGA.D5.7000.01A.11R.A32Z.07	T
TCGA.DC.4745.01A.01R.A32Z.07	T
TCGA.DC.4749.01A.01R.1736.07	T
TCGA.DC.5337.01A.01R.1660.07	T
TCGA.DC.6160.01A.11R.1660.07	T
TCGA.DC.6681.01A.11R.A32Z.07	T
TCGA.DC.6682.01A.11R.1830.07	T
TCGA.DM.A0X9.01A.11R.A155.07	T
TCGA.DM.A0XD.01A.12R.A155.07	T
TCGA.DM.A0XF.01A.11R.A155.07	T
TCGA.DM.A1D0.01A.11R.A155.07	T
TCGA.DM.A1D4.01A.21R.A155.07	T
TCGA.DM.A1D6.01A.21R.A155.07	T
TCGA.DM.A1D7.01A.11R.A155.07	T
TCGA.DM.A1D8.01A.11R.A155.07	T
TCGA.DM.A1D9.01A.11R.A155.07	T
TCGA.DM.A1DB.01A.11R.A155.07	T
TCGA.DM.A1HA.01A.11R.A155.07	T
TCGA.DM.A1HB.01A.21R.A180.07	T
TCGA.DM.A280.01A.12R.A16W.07	T
TCGA.DM.A282.01A.12R.A16W.07	T
TCGA.DM.A285.01A.11R.A16W.07	T
TCGA.DM.A288.01A.11R.A16W.07	T
TCGA.DM.A28A.01A.21R.A32Y.07	T
TCGA.DM.A28F.01A.11R.A32Y.07	T
TCGA.DM.A28G.01A.11R.A16W.07	T
TCGA.DM.A28H.01A.11R.A16W.07	T
TCGA.DM.A28K.01A.21R.A32Y.07	T
TCGA.DM.A28M.01A.12R.A16W.07	T
TCGA.DY.A1DC.01A.31R.A155.07	T
TCGA.DY.A1DE.01A.11R.A155.07	T
TCGA.DY.A1H8.01A.21R.A155.07	T
TCGA.EI.6506.01A.11R.1736.07	T
TCGA.EI.6507.01A.11R.1736.07	T
TCGA.EI.6508.01A.11R.1736.07	T
TCGA.EI.6510.01A.11R.1736.07	T
TCGA.EI.6511.01A.11R.1736.07	T
TCGA.EI.6883.01A.31R.1928.07	T
TCGA.EI.6885.01A.11R.1928.07	T
TCGA.EI.6917.01A.11R.1928.07	T
TCGA.F4.6460.01A.11R.1774.07	T
TCGA.F4.6461.01A.11R.1774.07	T
TCGA.F4.6463.01A.11R.1723.07	T
TCGA.F4.6569.01A.11R.1774.07	T
TCGA.F4.6570.01A.11R.1774.07	T
TCGA.F4.6703.01A.11R.1839.07	T
TCGA.F4.6704.01A.11R.1839.07	T
TCGA.F4.6806.01A.11R.1839.07	T
TCGA.F4.6807.01A.11R.1839.07	T
TCGA.F4.6808.01A.11R.1839.07	T
TCGA.F4.6809.01A.11R.1839.07	T
TCGA.F4.6854.01A.11R.1928.07	T
TCGA.F4.6855.01A.11R.1928.07	T
TCGA.F4.6856.01A.11R.1928.07	T
TCGA.F5.6702.01A.11R.1830.07	T
TCGA.F5.6812.01A.11R.1830.07	T
TCGA.F5.6813.01A.11R.1830.07	T
TCGA.F5.6863.01A.11R.1928.07	T
TCGA.G4.6293.01A.11R.1723.07	T
TCGA.G4.6295.01A.11R.1723.07	T
TCGA.G4.6297.01A.11R.1723.07	T
TCGA.G4.6298.01A.11R.1723.07	T
TCGA.G4.6302.01A.11R.1723.07	T
TCGA.G4.6303.01A.11R.1774.07	T
TCGA.G4.6306.01A.11R.1774.07	T
TCGA.G4.6307.01A.11R.1723.07	T
TCGA.G4.6309.01A.21R.1839.07	T
TCGA.G4.6310.01A.11R.1723.07	T
TCGA.G4.6311.01A.11R.1723.07	T
TCGA.G4.6314.01A.11R.1723.07	T
TCGA.G4.6315.01A.11R.1723.07	T
TCGA.G4.6320.01A.11R.1723.07	T
TCGA.G4.6321.01A.11R.1723.07	T
TCGA.G4.6322.01A.11R.1723.07	T
TCGA.G4.6323.01A.11R.1723.07	T
TCGA.G4.6586.01A.11R.1774.07	T
TCGA.G4.6588.01A.11R.1774.07	T
TCGA.G4.6626.01A.11R.1774.07	T
TCGA.G4.6627.01A.11R.1774.07	T
TCGA.G4.6628.01A.11R.1839.07	T
TCGA.G5.6233.01A.11R.1736.07	T
TCGA.G5.6572.01A.11R.1830.07	T
TCGA.G5.6572.02A.12R.1830.07	N
TCGA.G5.6641.01A.11R.A32Z.07	T
TCGA.NH.A50T.01A.11R.A28H.07	T
TCGA.NH.A50U.01A.33R.A37K.07	T
TCGA.NH.A50V.01A.11R.A28H.07	T
TCGA.NH.A5IV.01A.42R.A37K.07	T
TCGA.NH.A6GA.01A.11R.A37K.07	T
TCGA.NH.A6GB.01A.11R.A37K.07	T
TCGA.NH.A6GC.01A.12R.A41B.07	T
TCGA.NH.A8F7.01A.11R.A41B.07	T
TCGA.NH.A8F8.01A.72R.A41B.07	T
TCGA.QG.A5YV.01A.11R.A28H.07	T
TCGA.QG.A5YW.01A.11R.A28H.07	T
TCGA.QG.A5YX.01A.11R.A28H.07	T
TCGA.QG.A5Z1.01A.11R.A28H.07	T
TCGA.QG.A5Z2.01A.11R.A28H.07	T
TCGA.QL.A97D.01A.12R.A41B.07	T
TCGA.RU.A8FL.01A.11R.A37K.07	T
TCGA.SS.A7HO.01A.21R.A37K.07	T
TCGA.T9.A92H.01A.11R.A37K.07	T
TCGA.WS.AB45.01A.11R.A41B.07	T
